# Supplementary material for: Crop Expansion and Conservation Priorities in Tropical Countries
Source: PubMed Central journal article supplement (PMC3541398; doi:10.1371/journal.pone.0051759), 2013-01-09
Supplement: pone.0051759.s002.pdf [file pone.0051759.s002.pdf]

**Table S1. Harvested area, annual increment, % rate of expansion and regression statistics for 146 crops in tropical countries, during the period 1999–2008. The 12 most important tropical crops (see text) are in bold.**

| #  | Crop                          | Harvested area 2008<br>(km <sup>2</sup> ) | Annual increment<br>(km <sup>2</sup> ) | Annual rate of<br>increase | P                | R <sup>2</sup> |
|----|-------------------------------|-------------------------------------------|----------------------------------------|----------------------------|------------------|----------------|
| 1  | <b>Soybeans</b>               | <b>362,162</b>                            | <b>16,907</b>                          | <b>4.67%</b>               | <b>&lt;0.001</b> | <b>0.890</b>   |
| 2  | <b>Maize</b>                  | <b>711,320</b>                            | <b>15,576</b>                          | <b>2.19%</b>               | <b>&lt;0.001</b> | <b>0.937</b>   |
| 3  | <b>Rice, paddy</b>            | <b>1,180,816</b>                          | <b>6,001</b>                           | <b>0.51%</b>               | <b>0.049</b>     | <b>0.402</b>   |
| 4  | <b>Sorghum</b>                | <b>398,759</b>                            | <b>5,658</b>                           | <b>1.42%</b>               | <b>0.013</b>     | <b>0.558</b>   |
| 5  | <b>Oil palm fruit</b>         | <b>146,016</b>                            | <b>5,615</b>                           | <b>3.85%</b>               | <b>&lt;0.001</b> | <b>0.997</b>   |
| 6  | <b>Beans, dry</b>             | <b>231,974</b>                            | <b>5,438</b>                           | <b>2.34%</b>               | <b>0.005</b>     | <b>0.653</b>   |
| 7  | <b>Sugar cane</b>             | <b>198,838</b>                            | <b>3,779</b>                           | <b>1.90%</b>               | <b>0.002</b>     | <b>0.705</b>   |
| 8  | <b>Cow peas, dry</b>          | <b>118,564</b>                            | <b>3,585</b>                           | <b>3.02%</b>               | <b>0.002</b>     | <b>0.714</b>   |
| 9  | <b>Wheat</b>                  | <b>485,137</b>                            | <b>3,450</b>                           | <b>0.71%</b>               | <b>0.048</b>     | <b>0.404</b>   |
| 10 | <b>Cassava</b>                | <b>183,898</b>                            | <b>2,286</b>                           | <b>1.24%</b>               | <b>&lt;0.001</b> | <b>0.965</b>   |
| 11 | Cocoa beans                   | 86,524                                    | 2,220                                  | 2.57%                      | 0.002            | 0.735          |
| 12 | Barley                        | 74,065                                    | 2,043                                  | 2.76%                      | 0.002            | 0.701          |
| 13 | <b>Millet</b>                 | <b>344,075</b>                            | <b>1,866</b>                           | <b>0.54%</b>               | <b>0.220</b>     | <b>0.181</b>   |
| 14 | Mangoes, mangosteens, guavas  | 39,464                                    | 1,567                                  | 3.97%                      | <0.001           | 0.936          |
| 15 | Sunflower seed                | 33,839                                    | 1,483                                  | 4.38%                      | <0.001           | 0.802          |
| 16 | Natural rubber                | 83,544                                    | 1,418                                  | 1.70%                      | <0.001           | 0.873          |
| 17 | Cashewnuts, with shell        | 41,125                                    | 1,352                                  | 3.29%                      | <0.001           | 0.956          |
| 18 | Potatoes                      | 44,933                                    | 1,285                                  | 2.86%                      | <0.001           | 0.908          |
| 19 | Cereals NES                   | 35,464                                    | 1,219                                  | 3.44%                      | 0.028            | 0.472          |
| 20 | Yams                          | 49,752                                    | 1,158                                  | 2.33%                      | <0.001           | 0.985          |
| 21 | Sesame seed                   | 66,291                                    | 1,048                                  | 1.58%                      | 0.027            | 0.476          |
| 22 | Rapeseed                      | 79,274                                    | 938                                    | 1.18%                      | 0.447            | 0.074          |
| 23 | Seed cotton                   | 150,480                                   | 919                                    | 0.61%                      | 0.364            | 0.104          |
| 24 | <b>Groundnuts, with shell</b> | <b>183,702</b>                            | <b>903</b>                             | <b>0.49%</b>               | <b>0.185</b>     | <b>0.208</b>   |
| 25 | Sweet potatoes                | 43,883                                    | 884                                    | 2.01%                      | <0.001           | 0.874          |
| 26 | Fruit Fresh NES               | 28,452                                    | 844                                    | 2.97%                      | <0.001           | 0.803          |
| 27 | Chick peas                    | 86,484                                    | 809                                    | 0.94%                      | 0.468            | 0.068          |
| 28 | Bananas                       | 43,759                                    | 751                                    | 1.72%                      | <0.001           | 0.903          |
| 29 | Vegetables fresh NES          | 67,064                                    | 702                                    | 1.05%                      | 0.228            | 0.176          |
| 30 | Onions, dry                   | 16,253                                    | 678                                    | 4.17%                      | <0.001           | 0.891          |
| 31 | Pigeon peas                   | 48,389                                    | 649                                    | 1.34%                      | <0.001           | 0.869          |
| 32 | Fruit, tropical fresh NES     | 15,894                                    | 474                                    | 2.98%                      | <0.001           | 0.966          |
| 33 | Plantains                     | 53,878                                    | 472                                    | 0.88%                      | <0.001           | 0.787          |
| 34 | Oats                          | 11,496                                    | 452                                    | 3.93%                      | 0.049            | 0.403          |
| 35 | Arecanuts                     | 7,507                                     | 351                                    | 4.67%                      | <0.001           | 0.951          |
| 36 | Tomatoes                      | 15,352                                    | 326                                    | 2.12%                      | <0.001           | 0.867          |
| 37 | Melonseed                     | 10,979                                    | 285                                    | 2.60%                      | <0.001           | 0.900          |
| 38 | Taro (cocoyam)                | 15,242                                    | 285                                    | 1.87%                      | <0.001           | 0.951          |
| 39 | Oranges                       | 23,071                                    | 244                                    | 1.06%                      | 0.012            | 0.562          |
| 40 | Tea                           | 13,688                                    | 237                                    | 1.73%                      | <0.001           | 0.822          |
| 41 | Broad beans, horsebeans, dry  | 9,200                                     | 223                                    | 2.42%                      | 0.004            | 0.671          |
| 42 | Okra                          | 9,367                                     | 219                                    | 2.34%                      | <0.001           | 0.898          |
| 43 | Roots and Tubers NES          | 10,064                                    | 218                                    | 2.16%                      | <0.001           | 0.973          |
| 44 | Lemons and limes              | 6,300                                     | 198                                    | 3.15%                      | 0.009            | 0.590          |
| 45 | Cauliflowers and broccoli     | 4,769                                     | 188                                    | 3.94%                      | <0.001           | 0.905          |
| 46 | Pineapples                    | 7,619                                     | 153                                    | 2.00%                      | <0.001           | 0.949          |
| 47 | Eggplants (aubergines)        | 7,026                                     | 137                                    | 1.96%                      | <0.001           | 0.888          |
| 48 | Ginger                        | 3,743                                     | 130                                    | 3.48%                      | <0.001           | 0.881          |
| 49 | Pepper (Piper spp.)           | 4,885                                     | 117                                    | 2.38%                      | 0.010            | 0.583          |
| 50 | Grapes                        | 4,092                                     | 114                                    | 2.80%                      | <0.001           | 0.946          |

| #   | Crop                           | Harvested area 2008<br>(km <sup>2</sup> ) | Annual increment<br>(km <sup>2</sup> ) | Annual rate of<br>increase | P      | R <sup>2</sup> |
|-----|--------------------------------|-------------------------------------------|----------------------------------------|----------------------------|--------|----------------|
| 51  | Castor oil seed                | 13,045                                    | 105                                    | 0.81%                      | 0.593  | 0.037          |
| 52  | Coconuts                       | 112,005                                   | 104                                    | 0.09%                      | 0.749  | 0.014          |
| 53  | Sisal                          | 4,352                                     | 101                                    | 2.33%                      | 0.001  | 0.740          |
| 54  | Watermelons                    | 4,302                                     | 99                                     | 2.30%                      | <0.001 | 0.903          |
| 55  | Nutmeg, mace and cardamoms     | 2,635                                     | 99                                     | 3.74%                      | <0.001 | 0.848          |
| 56  | Fonio                          | 4,458                                     | 97                                     | 2.19%                      | 0.007  | 0.621          |
| 57  | Canary seed                    | 832                                       | 92                                     | 11.11%                     | 0.001  | 0.754          |
| 58  | Avocados                       | 3,028                                     | 82                                     | 2.71%                      | <0.001 | 0.977          |
| 59  | Nuts NES                       | 4,473                                     | 77                                     | 1.72%                      | 0.014  | 0.552          |
| 60  | Maize, green                   | 6,370                                     | 75                                     | 1.17%                      | <0.001 | 0.899          |
| 61  | Tobacco, unmanufactured        | 17,007                                    | 73                                     | 0.43%                      | 0.402  | 0.089          |
| 62  | Triticale                      | 3,996                                     | 71                                     | 1.79%                      | 0.094  | 0.311          |
| 63  | Pumpkins, squash and gourds    | 7,748                                     | 71                                     | 0.92%                      | 0.027  | 0.478          |
| 64  | Cucumbers and gherkins         | 3,179                                     | 67                                     | 2.12%                      | <0.001 | 0.852          |
| 65  | Mustard seed                   | 929                                       | 67                                     | 7.23%                      | <0.001 | 0.936          |
| 66  | Karite Nuts (Sheanuts)         | 4,030                                     | 66                                     | 1.64%                      | 0.003  | 0.685          |
| 67  | Papayas                        | 3,984                                     | 63                                     | 1.58%                      | <0.001 | 0.909          |
| 68  | Vanilla                        | 806                                       | 60                                     | 7.50%                      | <0.001 | 0.764          |
| 69  | Garlic                         | 2,755                                     | 56                                     | 2.02%                      | <0.001 | 0.802          |
| 70  | Othermelons (inc. cantaloupes) | 2,014                                     | 53                                     | 2.65%                      | <0.001 | 0.871          |
| 71  | Citrusfruit NES                | 9,640                                     | 50                                     | 0.52%                      | <0.001 | 0.940          |
| 72  | Cashewapple                    | 6,810                                     | 48                                     | 0.70%                      | <0.001 | 0.886          |
| 73  | Chillies and peppers, green    | 7,143                                     | 45                                     | 0.63%                      | 0.181  | 0.212          |
| 74  | Cabbages and other brassicas   | 5,741                                     | 45                                     | 0.78%                      | 0.050  | 0.399          |
| 75  | Cinnamon (canella)             | 1,407                                     | 41                                     | 2.91%                      | <0.001 | 0.906          |
| 76  | Oilseeds NES                   | 11,661                                    | 40                                     | 0.35%                      | 0.625  | 0.031          |
| 77  | Manila Fibre (Abaca)           | 1,634                                     | 40                                     | 2.42%                      | <0.001 | 0.876          |
| 78  | Bambara beans                  | 1,070                                     | 38                                     | 3.52%                      | 0.005  | 0.647          |
| 79  | Apples                         | 4,153                                     | 37                                     | 0.88%                      | 0.118  | 0.277          |
| 80  | Fibre Crops NES                | 2,763                                     | 31                                     | 1.13%                      | 0.006  | 0.636          |
| 81  | Beans, green                   | 4,210                                     | 31                                     | 0.73%                      | 0.019  | 0.517          |
| 82  | Carrots and turnips            | 1,638                                     | 27                                     | 1.64%                      | <0.001 | 0.915          |
| 83  | Spices NES                     | 6,528                                     | 24                                     | 0.37%                      | 0.756  | 0.013          |
| 84  | String beans                   | 329                                       | 23                                     | 6.91%                      | <0.001 | 0.763          |
| 85  | Spinach                        | 600                                       | 21                                     | 3.49%                      | <0.001 | 0.800          |
| 86  | Walnuts, with shell            | 902                                       | 20                                     | 2.22%                      | <0.001 | 0.980          |
| 87  | Chestnuts                      | 403                                       | 19                                     | 4.69%                      | <0.001 | 0.853          |
| 88  | Berries NES                    | 494                                       | 18                                     | 3.55%                      | <0.001 | 0.916          |
| 89  | Olives                         | 300                                       | 17                                     | 5.58%                      | <0.001 | 0.906          |
| 90  | Quinoa                         | 785                                       | 14                                     | 1.78%                      | 0.001  | 0.739          |
| 91  | Dates                          | 2,646                                     | 14                                     | 0.52%                      | 0.009  | 0.594          |
| 92  | Plums and sloes                | 512                                       | 13                                     | 2.56%                      | <0.001 | 0.868          |
| 93  | Sugar crops NES                | 1,202                                     | 13                                     | 1.04%                      | <0.001 | 0.866          |
| 94  | Yautia (cocoyam)               | 481                                       | 12                                     | 2.58%                      | 0.016  | 0.536          |
| 95  | Peas, green                    | 4,261                                     | 11                                     | 0.26%                      | 0.608  | 0.034          |
| 96  | Lettuce and chicory            | 1,712                                     | 10                                     | 0.57%                      | 0.004  | 0.667          |
| 97  | Artichokes                     | 79                                        | 10                                     | 12.26%                     | <0.001 | 0.875          |
| 98  | Leguminous vegetables NES      | 785                                       | 10                                     | 1.22%                      | <0.001 | 0.834          |
| 99  | Asparagus                      | 485                                       | 8                                      | 1.64%                      | 0.007  | 0.621          |
| 100 | Anise, badian, fennel, corian  | 3,173                                     | 7                                      | 0.23%                      | 0.001  | 0.758          |
| 101 | Almonds, with shell            | 185                                       | 7                                      | 3.73%                      | 0.008  | 0.608          |
| 102 | Onions (inc. shallots), green  | 547                                       | 6                                      | 1.03%                      | 0.116  | 0.280          |
| 103 | Hops                           | 256                                       | 5                                      | 1.79%                      | 0.010  | 0.588          |
| 104 | Pyrethrum, Dried               | 267                                       | 4                                      | 1.64%                      | 0.026  | 0.481          |

| #   | Crop                         | Harvested area 2008<br>(km <sup>2</sup> ) | Annual increment<br>(km <sup>2</sup> ) | Annual rate of<br>increase | P      | R <sup>2</sup> |
|-----|------------------------------|-------------------------------------------|----------------------------------------|----------------------------|--------|----------------|
| 105 | Apricots                     | 127                                       | 3                                      | 2.74%                      | 0.011  | 0.579          |
| 106 | Persimmons                   | 89                                        | 3                                      | 3.56%                      | <0.001 | 0.912          |
| 107 | Agave Fibres NES             | 533                                       | 2                                      | 0.45%                      | 0.001  | 0.749          |
| 108 | Strawberries                 | 145                                       | 2                                      | 1.67%                      | 0.054  | 0.388          |
| 109 | Maté                         | 1,032                                     | 2                                      | 0.22%                      | 0.796  | 0.009          |
| 110 | Grapefruit (inc. pomelos)    | 1,063                                     | 2                                      | 0.20%                      | 0.590  | 0.038          |
| 111 | Sugar beet                   | 33                                        | 1                                      | 3.60%                      | 0.008  | 0.601          |
| 112 | Buckwheat                    | 480                                       | 1                                      | 0.24%                      | 0.407  | 0.088          |
| 113 | Raspberries                  | 11                                        | 1                                      | 6.94%                      | <0.001 | 0.850          |
| 114 | Chicory roots                | 7                                         | 1                                      | 8.79%                      | <0.001 | 0.837          |
| 115 | Cherries                     | 41                                        | 1                                      | 1.24%                      | <0.001 | 0.826          |
| 116 | Stone fruit NES              | 43                                        | 0.4                                    | 0.90%                      | 0.651  | 0.027          |
| 117 | Mushrooms and truffles       | 8                                         | 0.3                                    | 4.35%                      | 0.010  | 0.583          |
| 118 | Sour cherries                | 5                                         | 0.2                                    | 4.67%                      | <0.001 | 0.821          |
| 119 | Hazelnuts, with shell        | 1                                         | 0.1                                    | 12.73%                     | 0.006  | 0.636          |
| 120 | Ramie                        | 35                                        | 0.1                                    | 0.30%                      | 0.130  | 0.262          |
| 121 | Currants                     | 2                                         | 0.1                                    | 3.29%                      | 0.025  | 0.485          |
| 122 | Figs                         | 80                                        | 0.02                                   | 0.02%                      | 0.937  | 0.001          |
| 123 | Carobs                       | 1                                         | -0.01                                  | -2.42%                     | 0.722  | 0.017          |
| 124 | Pistachios                   | 6                                         | -0.1                                   | -0.96%                     | 0.132  | 0.260          |
| 125 | Blueberries                  | 0                                         | -0.1                                   | -52.21%                    | 0.004  | 0.674          |
| 126 | Brazilnuts, with shell       | 7                                         | -0.1                                   | -1.39%                     | 0.549  | 0.047          |
| 127 | Kiwi fruit                   | 2                                         | -0.2                                   | -6.75%                     | 0.070  | 0.354          |
| 128 | Tung Nuts                    | 166                                       | -0.3                                   | -0.17%                     | 0.848  | 0.005          |
| 129 | Peaches and nectarines       | 1,200                                     | -1                                     | -0.12%                     | 0.788  | 0.010          |
| 130 | Pears                        | 424                                       | -2                                     | -0.43%                     | 0.027  | 0.478          |
| 131 | Quinces                      | 19                                        | -2                                     | -9.93%                     | 0.003  | 0.678          |
| 132 | Rye                          | 404                                       | -3                                     | -0.78%                     | 0.047  | 0.409          |
| 133 | Vetches                      | 1,833                                     | -5                                     | -0.29%                     | 0.770  | 0.011          |
| 134 | Kolanuts                     | 3,765                                     | -9                                     | -0.24%                     | 0.213  | 0.187          |
| 135 | Tangerines, mandarins, clem. | 1,847                                     | -10                                    | -0.55%                     | 0.011  | 0.579          |
| 136 | Lentils                      | 16,475                                    | -39                                    | -0.24%                     | 0.743  | 0.014          |
| 137 | Other Bastfibres             | 2,162                                     | -62                                    | -2.85%                     | 0.002  | 0.719          |
| 138 | Linseed                      | 7,965                                     | -89                                    | -1.11%                     | 0.274  | 0.147          |
| 139 | Peas, dry                    | 14,947                                    | -90                                    | -0.61%                     | 0.523  | 0.053          |
| 140 | Pulses NES                   | 35,208                                    | -96                                    | -0.27%                     | 0.632  | 0.030          |
| 141 | Chillies and peppers, dry    | 16,137                                    | -96                                    | -0.60%                     | 0.128  | 0.265          |
| 142 | Jute                         | 12,740                                    | -100                                   | -0.78%                     | 0.134  | 0.258          |
| 143 | Cloves                       | 3,842                                     | -128                                   | -3.34%                     | 0.066  | 0.362          |
| 144 | Safflower seed               | 4,451                                     | -182                                   | -4.08%                     | 0.013  | 0.556          |
| 145 | Coffee, green                | 97,310                                    | -488                                   | -0.50%                     | 0.163  | 0.227          |
| 146 | Lupins                       | 5,846                                     | -778                                   | -13.30%                    | <0.001 | 0.938          |
