# Supplementary material for: Crop Expansion and Conservation Priorities in Tropical Countries
Source: PubMed Central journal article supplement (PMC3541398; doi:10.1371/journal.pone.0051759), 2013-01-09
Supplement: pone.0051759.s003.pdf [file pone.0051759.s003.pdf]

**Table S2. Areas and changes in area of annual and perennial crops and total cropland, based on both crop data and land data, for the period 1999–2008, for 128 tropical countries. Increments are based on linear regression, and all areas are in km<sup>2</sup>. Countries are ordered by annual increment in total cropland. "NA" = not available.**

| #  | Country                      | Annual crops |                  |                  | Perennial crops |                  |                  | Total cropland |                  |
|----|------------------------------|--------------|------------------|------------------|-----------------|------------------|------------------|----------------|------------------|
|    |                              | land data    |                  | crop data        | land data       |                  | crop data        | land data      |                  |
|    |                              | 2008 area    | annual increment | annual increment | 2008 area       | annual increment | annual increment | 2008 area      | annual increment |
| 1  | Nigeria                      | 375,000      | 9,758            | 6,396            | 30,000          | 500              | 724              | 405,000        | 10,258           |
| 2  | Indonesia                    | 220,000      | 2,815            | 442              | 151,000         | 3,011            | 5,100            | 371,000        | 5,826            |
| 3  | Ethiopia                     | 136,060      | 5,066            | 3,374            | 9,070           | 339              | 291              | 145,130        | 5,405            |
| 4  | Sudan                        | 206,980      | 5,086            | 1,879            | 2,080           | 141              | 8                | 209,060        | 5,227            |
| 5  | Brazil                       | 610,000      | 4,205            | 18,550           | 75,000          | 0                | 262              | 685,000        | 4,205            |
| 6  | Burkina Faso                 | 63,000       | 1,939            | 1,550            | 600             | 0                | 3                | 63,600         | 1,939            |
| 7  | Vietnam                      | 63,000       | 70               | 535              | 31,150          | 1,673            | 901              | 94,150         | 1,743            |
| 8  | Sierra Leone                 | 17,950       | 1,665            | 1,407            | 1,350           | 0                | 29               | 19,300         | 1,665            |
| 9  | Paraguay                     | 42,000       | 1,635            | 2,653            | 1,000           | 12               | 9                | 43,000         | 1,648            |
| 10 | Ghana                        | 44,000       | 465              | 606              | 28,500          | 1,103            | 935              | 72,500         | 1,568            |
| 11 | Myanmar (Burma)              | 106,000      | 891              | 5,444            | 11,000          | 611              | 138              | 117,000        | 1,502            |
| 12 | Guinea                       | 24,000       | 1,217            | 924              | 6,900           | 87               | 86               | 30,900         | 1,304            |
| 13 | Tanzania, United Republic of | 96,000       | 962              | 5,258            | 13,500          | 206              | 357              | 109,500        | 1,168            |
| 14 | Chad                         | 43,000       | 1,065            | 902              | 300             | 0                | 0                | 43,300         | 1,065            |
| 15 | Bolivia                      | 36,000       | 905              | 762              | 2,190           | 62               | 4                | 38,190         | 967              |
| 16 | Uganda                       | 56,500       | 660              | 1,050            | 22,500          | 203              | 176              | 79,000         | 863              |
| 17 | Mozambique                   | 45,000       | 718              | 977              | 2,500           | 5                | -37              | 47,500         | 724              |
| 18 | Ivory Coast                  | 28,000       | 6                | 462              | 42,500          | 645              | 1,072            | 70,500         | 652              |
| 19 | Malawi                       | 35,000       | 624              | 701              | 1,220           | -1               | -2               | 36,220         | 623              |
| 20 | Zimbabwe                     | 37,300       | 558              | 484              | 1,200           | 0                | 5                | 38,500         | 558              |
| 21 | Guatemala                    | 13,250       | 34               | 514              | 9,430           | 496              | 164              | 22,680         | 531              |
| 22 | Niger                        | 144,930      | 458              | 4,623            | 430             | 29               | 33               | 145,360        | 487              |
| 23 | Angola                       | 34,000       | 515              | 1,574            | 2,900           | -67              | -34              | 36,900         | 448              |
| 24 | Rwanda                       | 12,900       | 410              | 320              | 2,800           | 31               | 31               | 15,700         | 442              |
| 25 | Kenya                        | 53,000       | 373              | 232              | 5,000           | 31               | 94               | 58,000         | 404              |
| 26 | Philippines                  | 53,000       | 186              | 566              | 50,000          | 208              | 84               | 103,000        | 394              |
| 27 | Laos                         | 12,500       | 377              | 292              | 950             | 10               | 25               | 13,450         | 387              |
| 28 | Benin                        | 25,500       | 260              | -55              | 2,950           | 35               | 44               | 28,450         | 295              |
| 29 | Mali                         | 48,500       | 237              | 1,266            | 1,300           | 51               | 59               | 49,800         | 288              |
| 30 | Senegal                      | 35,000       | 243              | -118             | 540             | -1               | -14              | 35,540         | 242              |
| 31 | Sri Lanka                    | 12,500       | 298              | 122              | 9,500           | -60              | -94              | 22,000         | 238              |
| 32 | Peru                         | 36,500       | -24              | 175              | 7,900           | 260              | 222              | 44,400         | 236              |
| 33 | Zambia                       | 23,550       | 199              | 282              | 290             | 3                | -1               | 23,840         | 202              |
| 34 | Cambodia                     | 39,000       | 170              | 1,239            | 1,550           | 20               | -15              | 40,550         | 190              |
| 35 | Eritrea                      | 6,700        | 178              | 191              | 20              | -1               | 3                | 6,720          | 177              |
| 36 | Gambia, The                  | 3,900        | 124              | 129              | 50              | 0                | 0                | 3,950          | 124              |
| 37 | Haiti                        | 10,000       | 139              | 117              | 3,000           | -19              | 50               | 13,000         | 120              |
| 38 | Bangladesh                   | 79,000       | -441             | -180             | 8,000           | 536              | 497              | 87,000         | 96               |
| 39 | Papua New Guinea             | 2,700        | 70               | 45               | 6,500           | 7                | 36               | 9,200          | 78               |
| 40 | Nicaragua                    | 19,000       | 68               | 112              | 2,300           | -1               | 36               | 21,300         | 67               |
| 41 | Somalia                      | 10,000       | 46               | 66               | 270             | 3                | 4                | 10,270         | 49               |
| 42 | Timor-Leste                  | 1,600        | 52               | 44               | 650             | -3               | -4               | 2,250          | 49               |
| 43 | Madagascar                   | 29,500       | 48               | 198              | 6,000           | 0                | -38              | 35,500         | 48               |
| 44 | El Salvador                  | 6,850        | 67               | -40              | 2,300           | -23              | -3               | 9,150          | 44               |
| 45 | Liberia                      | 4,000        | 14               | 64               | 2,180           | 20               | 38               | 6,180          | 34               |
| 46 | Oman                         | 550          | 29               | 3                | 390             | -5               | -6               | 940            | 24               |
| 47 | Guinea-Bissau                | 3,000        | 10               | 10               | 2,500           | 14               | 16               | 5,500          | 23               |
| 48 | Cape Verde                   | 650          | 17               | -14              | 30              | 1                | 0                | 680            | 18               |
| 49 | Vanuatu                      | 200          | 0                | 2                | 1,250           | 16               | 4                | 1,450          | 16               |
| 50 | Solomon Islands              | 160          | 2                | 3                | 600             | 6                | 9                | 760            | 9                |
| 51 | Panama                       | 5,480        | 10               | 31               | 1,470           | -2               | 3                | 6,950          | 8                |
| 52 | Comoros                      | 800          | 1                | 11               | 550             | 6                | 6                | 1,350          | 7                |
| 53 | Sao Tome and Principe        | 90           | 4                | 1                | 450             | 1                | -7               | 540            | 5                |

| #   | Country                        | Annual crops |           |           | Perennial crops |           |           | Total cropland |           |
|-----|--------------------------------|--------------|-----------|-----------|-----------------|-----------|-----------|----------------|-----------|
|     |                                | land data    |           | crop data | land data       |           | crop data | land data      |           |
|     |                                | 2008 area    | annual    | annual    | 2008 area       | annual    | annual    | 2008 area      | annual    |
|     |                                |              | increment | increment |                 | increment | increment |                | increment |
| 54  | Cameroon                       | 59,630       | 4         | 1,581     | 12,000          | 0         | 120       | 71,630         | 4         |
| 55  | New Caledonia                  | 80           | 3         | 1         | 50              | 1         | 1         | 130            | 4         |
| 56  | Dominica                       | 50           | 1         | 0         | 160             | 3         | -2        | 210            | 4         |
| 57  | Western Samoa                  | 250          | -1        | 0         | 380             | 4         | 4         | 630            | 3         |
| 58  | Belize                         | 700          | 7         | 3         | 320             | -4        | -7        | 1,020          | 3         |
| 59  | French Guiana                  | 128          | 3         | -4        | 43              | 0         | 0         | 171            | 3         |
| 60  | French Polynesia               | 30           | 0         | 0         | 220             | 3         | 4         | 250            | 3         |
| 61  | Costa Rica                     | 2,000        | -18       | -23       | 3,000           | 20        | 32        | 5,000          | 2         |
| 62  | Brunei                         | 30           | 1         | -5        | 50              | 1         | 1         | 80             | 2         |
| 63  | Marshall Islands               | 20           | 2         | NA        | 80              | 0         | 0         | 100            | 2         |
| 64  | Congo                          | 4,900        | -3        | 49        | 520             | 3         | 3         | 5,420          | 0         |
| 65  | Grenada                        | 20           | 1         | 0         | 90              | -1        | -2        | 110            | 0         |
| 66  | Tonga                          | 150          | 0         | 1         | 120             | 0         | 0         | 270            | 0         |
| 67  | Niue                           | 10           | 0         | 0         | 30              | 0         | 0         | 40             | 0         |
| 68  | Djibouti                       | 10           | 0         | -4        | 0               | 0         | NA        | 10             | 0         |
| 69  | American Samoa                 | 20           | 0         | 2         | 30              | 0         | 0         | 50             | 0         |
| 70  | Antigua and Barbuda            | 80           | 0         | 0         | 10              | 0         | 0         | 90             | 0         |
| 71  | Aruba                          | 20           | 0         | NA        | NA              | 0         | NA        | 20             | 0         |
| 72  | Barbados                       | 160          | 0         | -2        | 10              | 0         | 0         | 170            | 0         |
| 73  | British Virgin Islands         | 10           | 0         | NA        | 10              | 0         | 0         | 20             | 0         |
| 74  | Cayman Islands                 | 2            | 0         | 0         | 5               | 0         | 0         | 7              | 0         |
| 75  | Fiji                           | 1,700        | 0         | 0         | 830             | 0         | 6         | 2,530          | 0         |
| 76  | Kiribati                       | 20           | 0         | 0         | 320             | 0         | 5         | 340            | 0         |
| 77  | Mayotte                        | 70           | 0         | NA        | 130             | 0         | NA        | 200            | 0         |
| 78  | Federated States of Micronesia | 25           | 0         | 0         | 170             | 0         | 0         | 195            | 0         |
| 79  | Montserrat                     | 20           | 0         | 0         | 0               | 0         | 0         | 20             | 0         |
| 80  | Nauru                          | 0            | 0         | 0         | 4               | 0         | 0         | 4              | 0         |
| 81  | Netherlands Antilles           | 80           | 0         | NA        | NA              | 0         | NA        | 80             | 0         |
| 82  | Northern Mariana Islands       | 10           | 0         | NA        | 10              | 0         | NA        | 20             | 0         |
| 83  | Palau                          | 10           | 0         | NA        | 20              | 0         | NA        | 30             | 0         |
| 84  | Saint Helena                   | 40           | 0         | NA        | NA              | 0         | NA        | 40             | 0         |
| 85  | Togo                           | 24,600       | -64       | 82        | 1,700           | 64        | 102       | 26,300         | 0         |
| 86  | Tokelau                        | 0            | 0         | 0         | 6               | 0         | 0         | 6              | 0         |
| 87  | Turks and Caicos Islands       | 10           | 0         | NA        | NA              | 0         | NA        | 10             | 0         |
| 88  | Wallis and Futuna              | 10           | 0         | 0         | 50              | 0         | 0         | 60             | 0         |
| 89  | Tuvalu                         | 0            | 0         | 0         | 18              | 0         | 0         | 18             | 0         |
| 90  | St. Vincent and the Grenadines | 50           | 0         | 1         | 30              | -1        | 2         | 80             | -1        |
| 91  | Singapore                      | 5            | -1        | 1         | 2               | 0         | 0         | 7              | -1        |
| 92  | Guam                           | 10           | -1        | 0         | 100             | 0         | 1         | 110            | -1        |
| 93  | Seychelles                     | 10           | 0         | 0         | 30              | -1        | -3        | 40             | -1        |
| 94  | United States Virgin Islands   | 10           | -1        | 0         | 10              | 0         | NA        | 20             | -1        |
| 95  | Guadeloupe                     | 211          | 3         | -1        | 34              | -4        | -4        | 245            | -1        |
| 96  | Maldives                       | 40           | 0         | 0         | 40              | -2        | -4        | 80             | -2        |
| 97  | Puerto Rico                    | 600          | 3         | -8        | 370             | -7        | -16       | 970            | -4        |
| 98  | Cook Islands                   | 20           | -2        | 0         | 10              | -3        | -2        | 30             | -5        |
| 99  | St. Lucia                      | 30           | 1         | -1        | 70              | -6        | -6        | 100            | -5        |
| 100 | St. Kitts and Nevis            | 40           | -4        | -2        | 1               | -1        | 0         | 41             | -5        |
| 101 | Reunion                        | 328          | -5        | -1        | 32              | -1        | 1         | 360            | -6        |
| 102 | Martinique                     | 110          | 0         | -1        | 60              | -6        | 13        | 170            | -6        |
| 103 | Namibia                        | 8,000        | -17       | 30        | 80              | 5         | 6         | 8,080          | -12       |
| 104 | Dominican Republic             | 8,000        | -12       | -64       | 5,000           | 0         | 46        | 13,000         | -12       |
| 105 | Mauritius                      | 870          | -14       | -13       | 40              | 0         | 2         | 910            | -14       |
| 106 | Suriname                       | 490          | -11       | -5        | 70              | -3        | 0         | 560            | -15       |
| 107 | Trinidad and Tobago            | 250          | -12       | -13       | 220             | -3        | 5         | 470            | -16       |
| 108 | Mexico                         | 248,000      | -524      | -570      | 27,000          | 508       | 220       | 275,000        | -17       |
| 109 | Central African Republic       | 19,300       | 1         | 181       | 800             | -19       | -28       | 20,100         | -18       |
| 110 | Malaysia                       | 18,000       | -19       | -52       | 57,850          | 0         | 898       | 75,850         | -19       |

| #   | Country             | Annual crops     |               |               | Perennial crops |               |               | Total cropland   |               |
|-----|---------------------|------------------|---------------|---------------|-----------------|---------------|---------------|------------------|---------------|
|     |                     | land data        |               | crop data     | land data       |               | crop data     | land data        |               |
|     |                     | 2008 area        | annual        | annual        | 2008 area       | annual        | annual        | 2008 area        | annual        |
|     |                     |                  | increment     | increment     |                 | increment     | increment     |                  | increment     |
| 111 | Jamaica             | 1,250            | -21           | -19           | 1,100           | 0             | 11            | 2,350            | -21           |
| 112 | Botswana            | 2,500            | -24           | -56           | 20              | 1             | 0             | 2,520            | -23           |
| 113 | Equatorial Guinea   | 1,310            | 1             | 0             | 750             | -27           | -29           | 2,060            | -26           |
| 114 | Gabon               | 3,250            | 0             | 8             | 1,500           | -30           | -5            | 4,750            | -30           |
| 115 | Burundi             | 9,000            | -83           | 36            | 3,900           | 44            | 57            | 12,900           | -39           |
| 116 | Venezuela           | 27,000           | 128           | 599           | 6,500           | -173          | -115          | 33,500           | -45           |
| 117 | Zaire               | 67,000           | 0             | -114          | 7,500           | -48           | -72           | 74,500           | -48           |
| 118 | Guyana              | 4,200            | -60           | -32           | 250             | -2            | -6            | 4,450            | -62           |
| 119 | Yemen               | 12,790           | -309          | 344           | 3,270           | 226           | -11           | 16,060           | -82           |
| 120 | Mauritania          | 4,000            | -100          | 62            | 110             | -2            | 3             | 4,110            | -102          |
| 121 | Saudi Arabia        | 34,460           | -206          | -143          | 2,300           | 51            | 90            | 36,760           | -156          |
| 122 | Honduras            | 10,180           | -263          | -96           | 4,100           | 72            | 118           | 14,280           | -191          |
| 123 | Cuba                | 35,700           | 12            | -844          | 4,000           | -224          | -80           | 39,700           | -212          |
| 124 | Thailand            | 152,000          | -705          | 593           | 36,500          | 342           | 618           | 188,500          | -363          |
| 125 | Ecuador             | 12,360           | -469          | 55            | 12,640          | -146          | -149          | 25,000           | -615          |
| 126 | Colombia            | 18,300           | -914          | 35            | 16,310          | -220          | 231           | 34,610           | -1,133        |
| 127 | India               | 1,581,450        | -4,083        | 11,628        | 111,750         | 2,392         | 3,241         | 1,693,200        | -1,690        |
| 128 | Australia           | 440,240          | -2,242        | 1,914         | 3,500           | 77            | 104           | 443,740          | -2,165        |
|     | <b>GRAND TOTALS</b> | <b>5,829,359</b> | <b>34,466</b> | <b>81,320</b> | <b>895,845</b>  | <b>13,088</b> | <b>16,713</b> | <b>6,725,204</b> | <b>47,554</b> |
