# Supplementary material for: Crop Expansion and Conservation Priorities in Tropical Countries
Source: PubMed Central journal article supplement (PMC3541398; doi:10.1371/journal.pone.0051759), 2013-01-09
Supplement: pone.0051759.s004.pdf [file pone.0051759.s004.pdf]

**Table S3. Scientific names of crops mentioned in the text.**

| <b>English name</b> | <b>Scientific name</b>                                             |
|---------------------|--------------------------------------------------------------------|
| Beans               | <i>Phaseolus</i> spp.                                              |
| Cassava             | <i>Manihot esculenta</i>                                           |
| Coca                | <i>Erythroxylum coca</i> , <i>E. novogranatense</i>                |
| Cocoa               | <i>Theobroma cacao</i>                                             |
| Coffee              | <i>Coffea arabica</i> , <i>C. canephora</i>                        |
| Cotton              | <i>Gossypium hirsutum</i> , other <i>Gossypium</i> spp.            |
| Cow peas            | <i>Vigna unguiculata</i> (= <i>V. sinensis</i> )                   |
| Groundnuts          | <i>Arachis hypogaea</i>                                            |
| Maize               | <i>Zea mays</i>                                                    |
| Millet              | <i>Pennisetum glaucum</i> , <i>Setaria italica</i> , other species |
| Oil palm            | <i>Elaeis guineensis</i> , <i>E. oleifera</i>                      |
| Rice                | <i>Oryza sativa</i> , <i>O. glaberrima</i>                         |
| Rubber              | <i>Hevea brasiliensis</i>                                          |
| Sorghum             | <i>Sorghum bicolor</i>                                             |
| Soybeans            | <i>Glycine max</i>                                                 |
| Sugar cane          | <i>Saccharum</i> spp.                                              |
| Tea                 | <i>Camellia sinensis</i>                                           |
| Wheat               | <i>Triticum</i> spp.                                               |
